# Supplementary material for: Feasibility of a novel exercise prehabilitation programme in patients scheduled for elective colorectal surgery: a feasibility randomised controlled trial
Source: PubMed Central journal article supplement (PMC7256075; doi:10.1007/s00520-019-05098-0), 2019-11-12
Supplement: 520_2019_5098_MOESM1_ESM.pdf [file 520_2019_5098_MOESM1_ESM.pdf]

# Electronic supplementary information

## **A novel exercise prehabilitation programme in patients scheduled for elective colorectal surgery: a pilot and feasibility randomised controlled trial.**

**Matthew J. Northgraves<sup>1,2</sup>, Lakshmanan Arunachalam<sup>3</sup>, Leigh A. Madden<sup>4</sup>, Philip Marshall<sup>2</sup>, John E. Hartley<sup>5</sup>, John MacFie<sup>6</sup> and Rebecca V. Vince<sup>2</sup>**

<sup>1</sup> Hull Health Trials Unit, University of Hull, Hull, UK

<sup>2</sup> Sport, Health and Exercise Science, School of Life Sciences, University of Hull, Hull, UK

<sup>3</sup> General Surgery, Pinderfields Hospital, Wakefield, UK

<sup>4</sup> Department of Biomedical Science, School of Life Sciences, University of Hull, Hull, UK

<sup>5</sup> Academic Surgical Unit, Castle Hill Hospital, Hull, UK

<sup>6</sup> Combined Gastroenterology Research Unit, Scarborough Hospital, Scarborough, UK

|                      | <b>Ankle ROM</b>             | <b>Reps</b> | <b>Total Sets</b> | <b>% HRR</b> | <b>Medial gluteal activation</b>            | <b>Reps</b> | <b>Total Sets</b> | <b>% HRR</b> | <b>T spine mobility</b>             | <b>Reps</b> | <b>Total Sets</b> | <b>% HRR</b> | <b>Shoulder function</b>         | <b>Reps</b>    | <b>Total Sets</b> | <b>% HRR</b> |       |
|----------------------|------------------------------|-------------|-------------------|--------------|---------------------------------------------|-------------|-------------------|--------------|-------------------------------------|-------------|-------------------|--------------|----------------------------------|----------------|-------------------|--------------|-------|
| Resistance Circuit 1 | Seated heel/toe mobilisation | 15-20       | 9                 | N/R          | Band resisted sit to stand                  | 8-12        | 33                | 35-45        | Seated/standing postural variations | 12-15       | 18                | 20-25        | Lying scapular setting           | 15-20          | 8                 | 10-20        |       |
|                      | Ankle mobilisation           | 15-20       | 156               | 30-60        | Side lying bent leg hip abduction           | 8-15        | 84                | 30-50        | Lying t-spine mobilisation          | 8-12        | 72                | 35-45        | Band pull apart                  | 8-12           | 119               | 25-65        |       |
|                      | Sit to stand                 | 8-12        | 39                | 20-45        | X-band walks                                | 8-12 steps  | 90                | 40-70        | Foot raised thoracic extension      | 8-12        | 60                | 50-65        | Band resisted external rotations | 8-12           | 51                | 25-65        |       |
|                      |                              |             |                   |              |                                             |             |                   |              |                                     |             |                   |              | Seated row                       | 8-12           | 43                | 30-60        |       |
|                      | <b>Hip flexor ROM</b>        | <b>Reps</b> | <b>Total Sets</b> | <b>% HRR</b> | <b>Gluteal activation</b>                   | <b>Reps</b> | <b>Total Sets</b> | <b>% HRR</b> | <b>Whole kinetic chain</b>          | <b>Reps</b> | <b>Total Sets</b> | <b>% HRR</b> | <b>Core control</b>              | <b>Reps</b>    | <b>Total Sets</b> | <b>% HRR</b> |       |
| Resistance Circuit 2 | Standing hip flexor stretch  | 3 x 15-30 s | 62                | 35-55        | Bilateral lying gluteal bridge              | 8-12        | 93                | 30-45        | Kettlebell swing                    | 8-15        | 24                | 50-90        | High kneeling band anti-rotation | 8-12           | 50                | 40-60        |       |
|                      | Lying hip flexor stretch     | 3 x 15-20 s | 7                 | N/R          | Cook hip lift                               | 8-12        | 34                | N/R          | Push press                          | 8-12        | 83                | 55-80        | Band resisted side shuffles      | 8-12           | 89                | 40-80        |       |
|                      | Split squat                  | 8-12        | 65                | 60-75        | Shoulders elevated bilateral gluteal bridge | 8-12        | 9                 | 70           |                                     |             |                   |              |                                  | Suitcase carry | 10-20 metres      | 9            | N/R   |
|                      |                              |             |                   |              |                                             |             |                   |              |                                     |             |                   |              |                                  | Ball passes    | 8-12              | 55           | 30-40 |

%HRR: minimum and maximum value recorded as % of HRR (values do not include all patients; N/R: Heart rate not recorded for this exercise in any patients).

N.B. Values for heel walking, rear foot elevated split squat, foot elevated single leg gluteal bridge & shoulders elevated unilateral gluteal bridge not included as they were not performed

**Supplementary Table 1:** Combined total number of sets performed and number of reps [range] per set from resistance circuits one & two in the PREHAB group (n = 10).

**Supplementary Table 2.** Summary of clinical outcomes.

|                                    |              | <b>Standard care</b> | <b>Prehabilitation</b> | <b>Median difference</b> |
|------------------------------------|--------------|----------------------|------------------------|--------------------------|
|                                    |              | <b>(n =11)</b>       | <b>(n =10)</b>         | <b>(95% CI)</b>          |
| <b>Length of stay</b>              | Median (IQR) | 8 (5)                | 10 (7)                 | 1                        |
|                                    | [Min/Max]    | [6; 27]              | [5; 12]                | -3; 6 days               |
| <b>Patients with complications</b> |              | 4 (36%)              | 3 (30%)                |                          |
| <b>Adverse events</b>              |              |                      |                        |                          |
|                                    | Related      | 0                    | 0                      | -                        |
|                                    | Unrelated    | 0                    | 1                      |                          |

**Supplementary Table 3.** Changes in health related quality of life following prehabilitation or standard care in colorectal surgery .

|               |   | Baseline*         | Pre-operative*    | Change†           |
|---------------|---|-------------------|-------------------|-------------------|
| EORTC QLQ-C30 |   |                   |                   |                   |
| PF            | P | 86.7 [66.7; 100]  | 93.3 [60; 100]    | 0.0 [-10.0; 16.7] |
|               | S | 100.0 [86.7; 100] | 100.0 [53.3; 100] | 0.0 [-16.7; 0.0]  |
| RF            | P | 100.0 [66.7; 100] | 100.0 [66.7; 100] | 0.0 [0.0; 16.7]   |
|               | S | 100.0 [83.3; 100] | 100.0 [83.3; 100] | 0.0 [0.0; 8.3]    |
| EF            | P | 83.3 [58.3; 100]  | 75.0 [50; 100]    | 0.0 [-20.8; 8.3]  |
|               | S | 100.0 [50; 100]   | 100.0 [58.3; 100] | 0.0 [-8.3; 4.2]   |
| CF            | P | 83.3 [83.3; 100]  | 83.3 [83.3; 100]  | 0.0 [-16.7; 8.3]  |
|               | S | 100.0 [83.3; 100] | 100.0 [83.3; 100] | 0.0 [0.0; 8.3]    |
| SF            | P | 83.3 [33.3; 100]  | 66.7 [16.7; 100]  | 0.0 [-16.7; 8.3]  |
|               | S | 100.0 [66.7; 100] | 100.0 [100]       | 0.0 [0; 16.7]     |
| GHS           | P | 83.3 [33.3; 91.7] | 83.3 [33.3; 100]  | 8.3 [-8.3; 16.7]  |
|               | S | 66.7 [16.7; 83.3] | 83.3 [33.3; 100]  | 8.3 [4.2; 16.7]   |
| HADS          |   |                   |                   |                   |
| A             | P | 4.0 [0; 10]       | 8.0 [0; 11]       | 2.0 [0.0; 5.5]    |
|               | S | 2.0 [0; 7]        | 3.0 [0; 10]       | 0.0 [-1.5; 1.5]   |
| D             | P | 2.0 [0; 7]        | 2.0 [1; 9]        | 0.0 [-1.0; 3.5]   |
|               | S | 2.0 [0; 6]        | 1.0 [0; 4]        | 0.0 [-1.0; 0.0]   |

P: Prehabilitation; S: Standard Care. \*Median [min-max]; †Median [95% CI]; PF: Physical functioning; RF: Role functioning; EF: Emotional functioning; CF: Cognitive functioning; Social functioning; GHS: Global health; A: Anxiety; D: Depression.
